# Supplementary material for: Peripheral Neuropathy Presents Similar Symptoms and Pathological Changes in Both High-Fat Diet and Pharmacologically Induced Pre- and Diabetic Mouse Models
Source: MDPI journal article supplement (doi:10.3390/life11111267), 2021-11-19
Supplement: s1 [file s1]

Supplementary materials

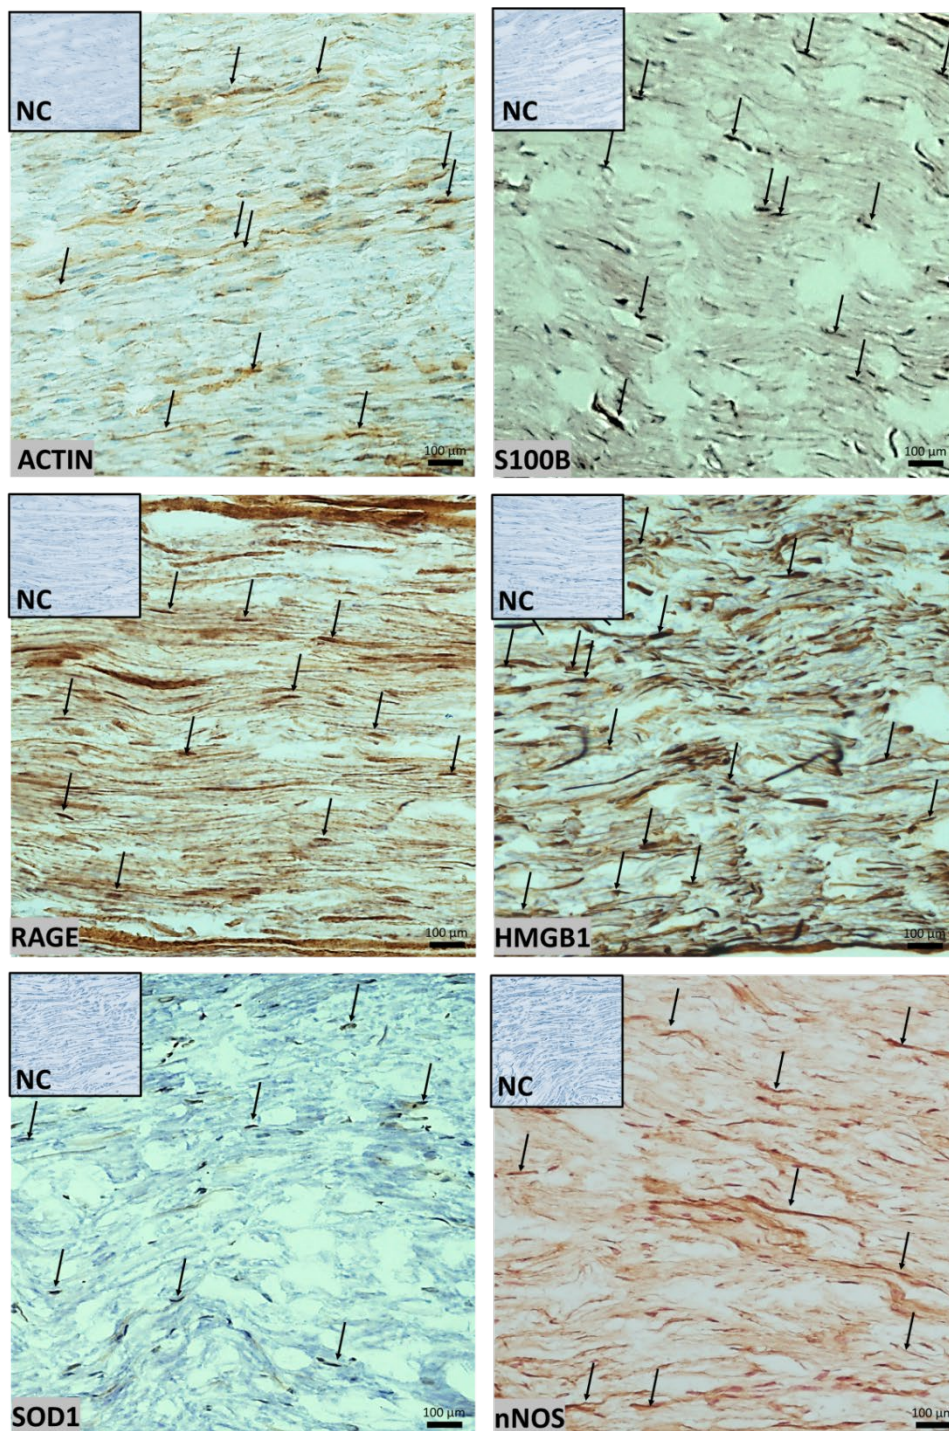

**Figure S1.** The presence and intracellular localization of  $\beta$ -ACTIN, S100B, RAGE, HMGB1, SOD1 and nNOS proteins in diabetic mouse sciatic nerve. Representative immunohistochemical (IHC) staining of mouse diabetic sciatic nerve with a 400  $\times$  magnification. Sciatic nerve was stained for  $\beta$ -ACTIN, S100B, RAGE, HMGB1, SOD1 and nNOS. Arrows indicate typical location of a given substance as stained by IHC. NC, negative control. Scale bar = 100  $\mu$ m;  $n = 4$ .

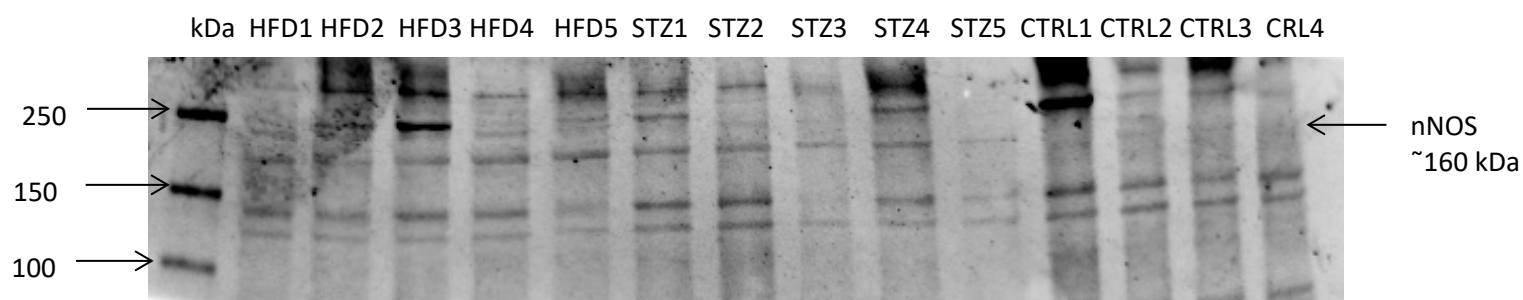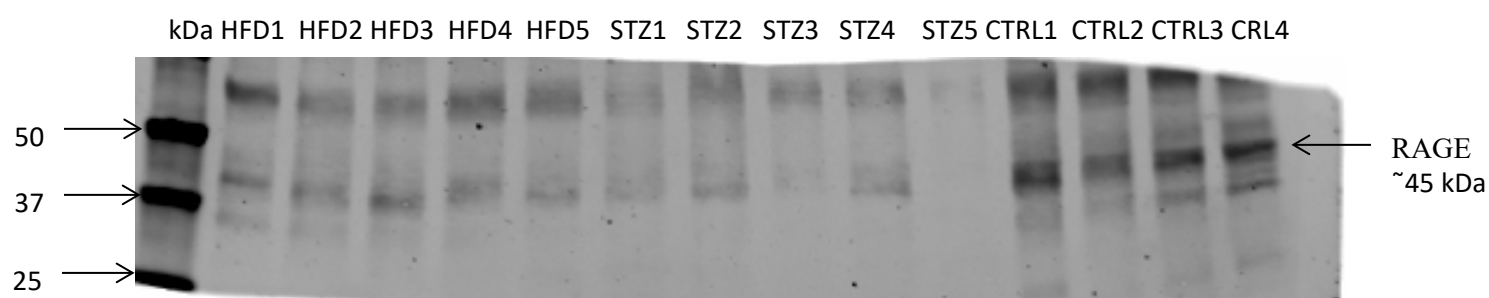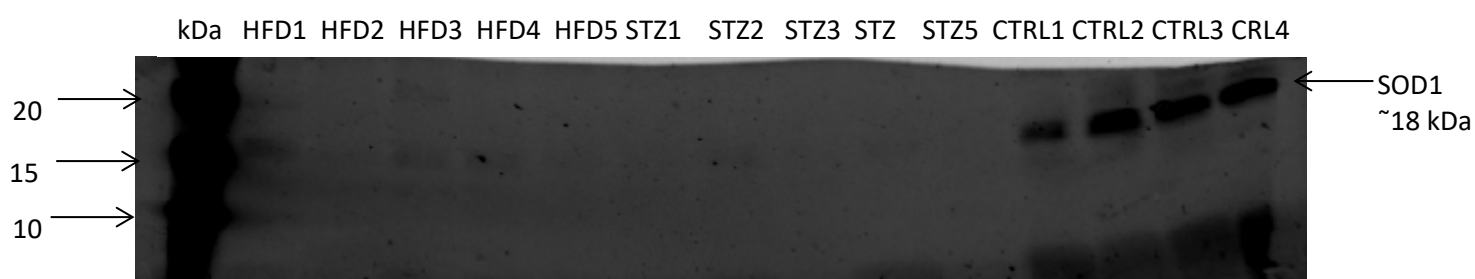

HFD1 HFD2 HFD3 HFD4 HFD5 STZ1 STZ2 STZ3 STZ4 STZ5 CTRL1 CTRL2 CTRL3 CRL4

total  
protein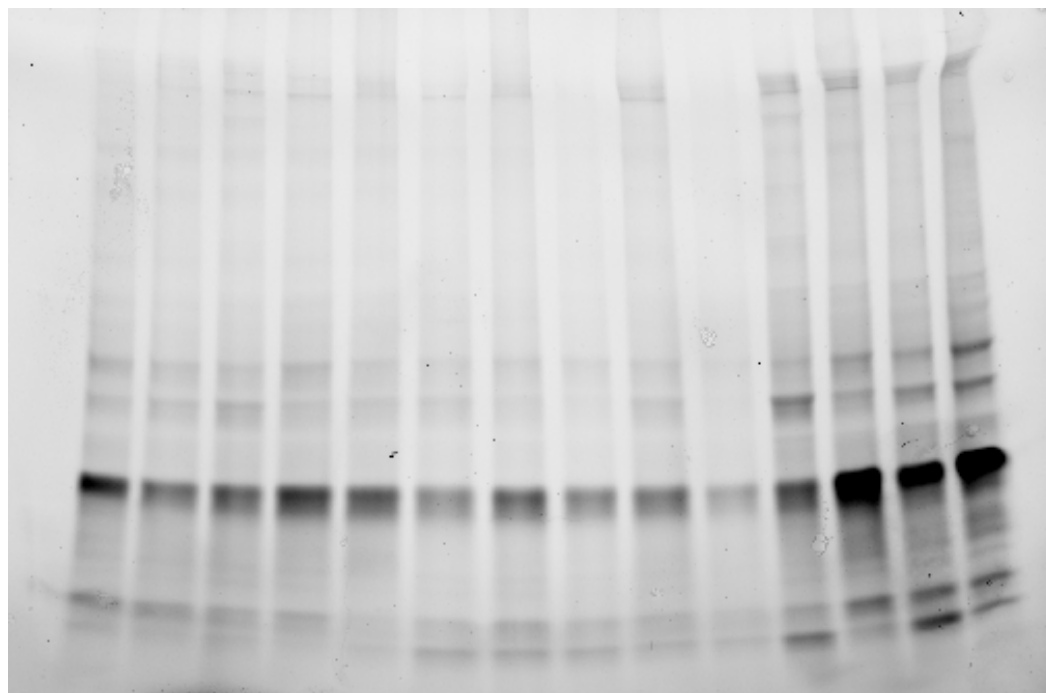

|       | nNOS/total<br>protein | RAGE/total<br>protein | SOD1/total<br>protein |
|-------|-----------------------|-----------------------|-----------------------|
| HFD1  | 2,3839                | 3,200309              | 1,499638              |
| HFD2  | 1,351527              | 4,097107              | 0,642672              |
| HFD3  | 1,890208              | 5,502389              | 0,265383              |
| HFD4  | 2,404352              | 2,576262              | 0,355775              |
| HFD5  | 3,199574              | 2,93817               | 0,103494              |
| STZ1  | 2,849426              | 2,887909              | 0,351274              |
| STZ2  | 1,530053              | 2,438737              | 0,20404               |
| STZ3  | 1,916563              | 1,182554              | 0,182949              |
| STZ4  | 2,226647              | 3,657102              | 0,202894              |
| STZ5  | 2,589181              | 0,475946              | 0,099415              |
| CTRL1 | 0,168022              | 8,605212              | 1,422198              |
| CTRL2 | 0,457213              | 2,425196              | 2,787161              |
| CTRL3 | 0,511497              | 4,113867              | 4,546964              |
| CTRL4 | 0,646247              | 4,660315              | 4,687937              |

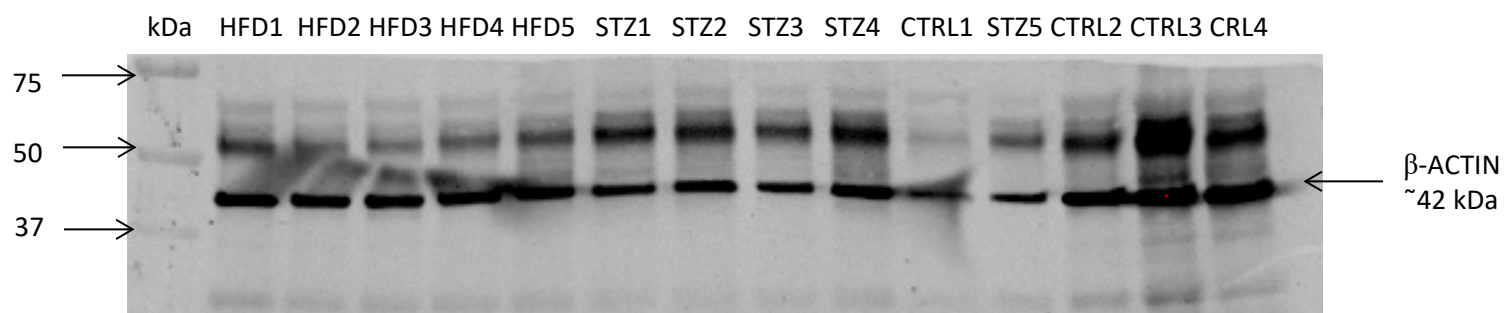

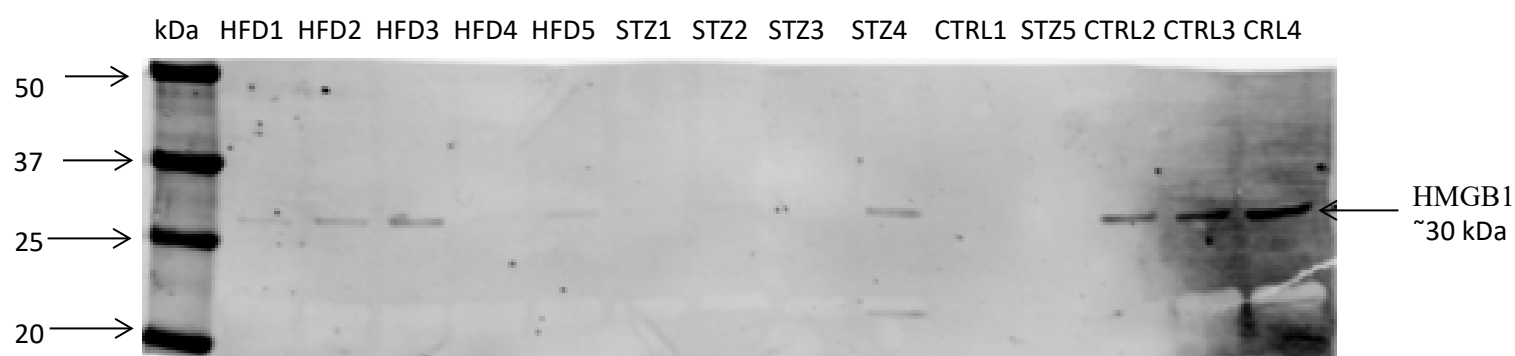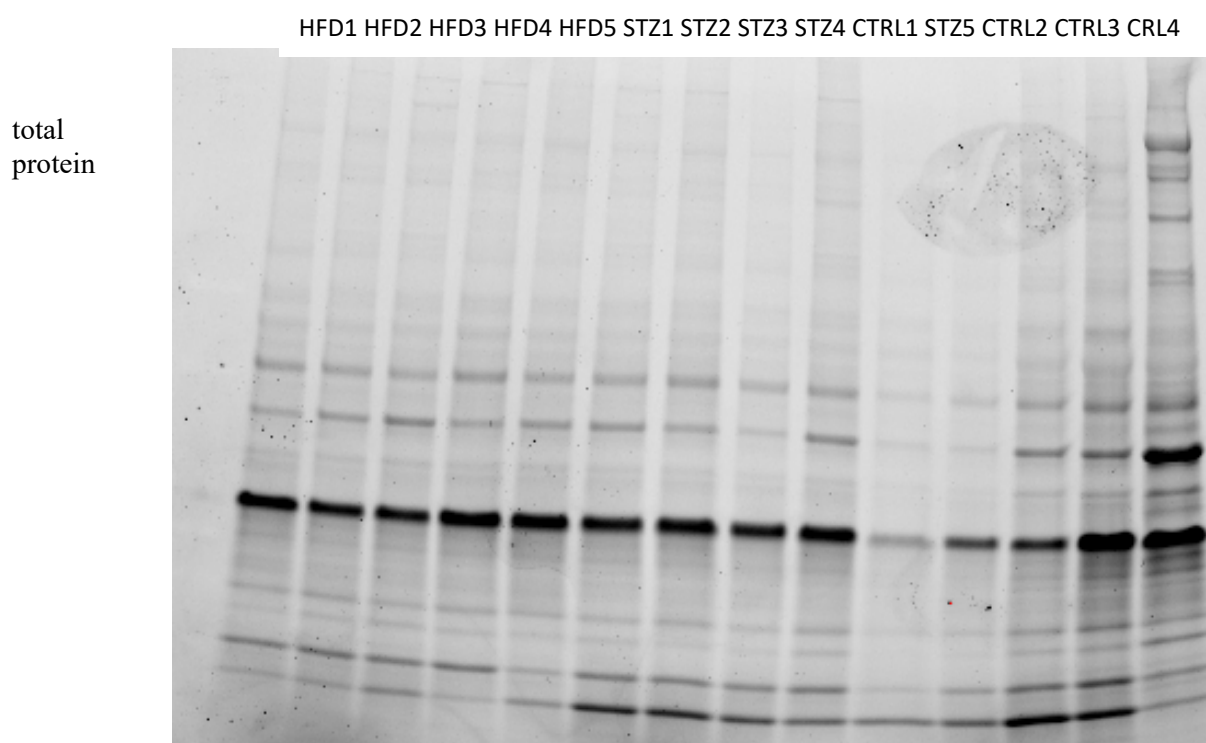

|      | $\beta$ -<br>ACTIN/total<br>protein | HMGB1/total<br>protein |
|------|-------------------------------------|------------------------|
| HFD1 | 6,699354                            | 1,39232                |
| HFD2 | 4,140765                            | 3,72447                |
| HFD3 | 2,943013                            | 4,539785               |
| HFD4 | 4,186469                            | 0,533688               |
| HFD5 | 3,654307                            | 0,793872               |
| STZ1 | 1,991332                            | 0,304987               |
| STZ2 | 2,14492                             | 1,239323               |

|       |          |          |
|-------|----------|----------|
| STZ3  | 2,496909 | 1,09564  |
| STZ4  | 3,945484 | 2,263745 |
| CTRL1 | 3,843156 | 0,094899 |
| STZ5  | 3,863384 | 0,326506 |
| CTRL2 | 7,302021 | 10,38958 |
| CTRL3 | 7,231243 | 7,191028 |
| CTRL4 | 2,435065 | 11,12288 |

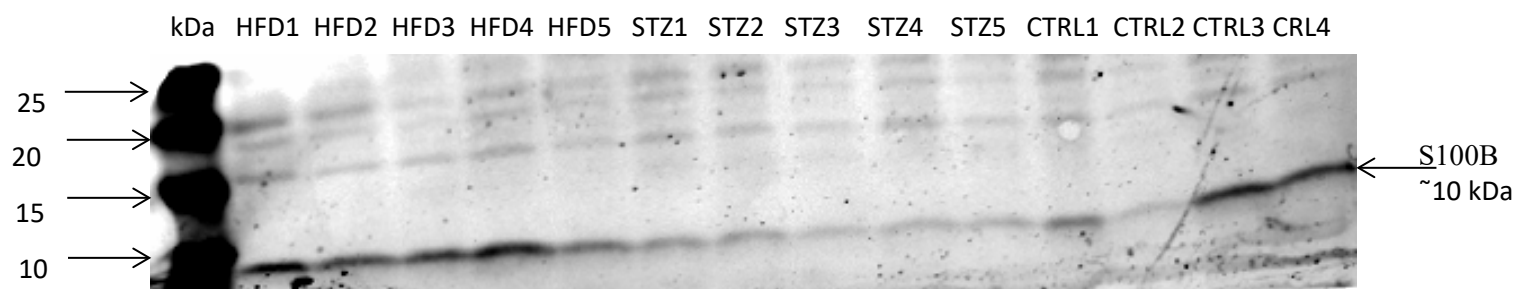

HFD1 HFD2 HFD3 HFD4 HFD5 STZ1 STZ2 STZ3 STZ4 STZ5 CTRL1 CTRL2 CTRL3 CTRL4

total  
protein

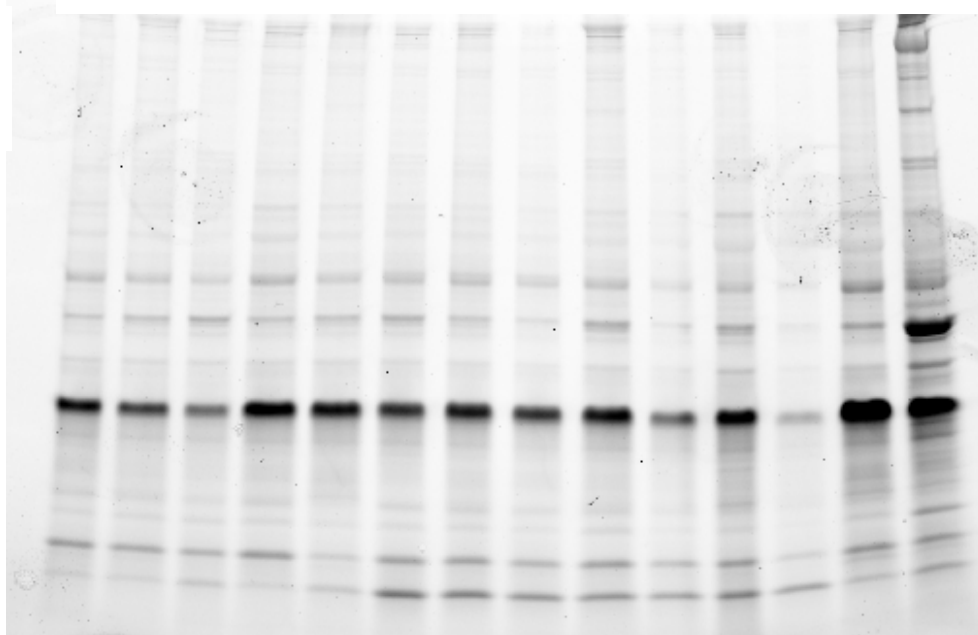

|      | S100B/total<br>protein |
|------|------------------------|
| HFD1 | 8,588954               |
| HFD2 | 4,375635               |
| HFD3 | 6,401761               |
| HFD4 | 5,869355               |
| HFD5 | 2,878934               |
| STZ1 | 1,898976               |



---

|       |          |
|-------|----------|
| STZ2  | 1,521093 |
| STZ3  | 1,039122 |
| STZ4  | 0,961297 |
| STZ5  | 1,672953 |
| CTRL1 | 1,755672 |
| CTRL2 | 1,918686 |
| CTRL3 | 2,864447 |
| CTRL4 | 2,652146 |

**Figure S2.** Western blots and densitometry analysis of proteins involved in neuroinflammation (RAGE, HMGB1, S100B),  $\beta$ -ACTIN and oxidative stress/antioxidant defense markers (SOD1, nNOS) in sciatic nerves of control (CTRL) and experimentally treated mice (HFD, STZ). An equal amount of protein (40  $\mu$ g) was fractionated on 15-well 4–15% Mini-PROTEAN® TGX™ Precast Protein Gels (Bio-Rad, CA, USA) and transferred to nitrocellulose membranes. The bands were visualized with ChemiDoc Imaging Systems (Bio-Rad). Images were quantified densitometrically with ImageJ Software 1.50i (Wayne Rasband, MD, USA) and compared to experimental condition after normalization to the total amount of protein in a sample. The results were expressed in relative folds change.
